# Supplementary material for: Fluoride Exposure and Salivary Glands: How Is Glandular Morphology Susceptible to Long-Term Exposure? A Preclinical Study
Source: MDPI journal article supplement (doi:10.3390/jcm11185373), 2022-09-13
Supplement: s1 [file s1]

**Supplementary Table S1:** Parametric results of the morphometric analysis of the parenchyma area, stromal area, and total acinar area, of parotid, submandibular and sublingual glands of mice exposed to 10mgF/L and 50mgF/L for 60 days. Results were expressed as mean  $\pm$  standard error of mean.

| PAROTID |                                  |                                  |                                  |
|---------|----------------------------------|----------------------------------|----------------------------------|
|         | Parenchyma area                  | Stromal area                     | Total acinar area                |
| Control | 43480 $\pm$ 1761 $\mu\text{m}^2$ | 21676 $\pm$ 3306 $\mu\text{m}^2$ | 41451 $\pm$ 1644 $\mu\text{m}^2$ |
| 10mgF/L | 49502 $\pm$ 1817 $\mu\text{m}^2$ | 17982 $\pm$ 1670 $\mu\text{m}^2$ | 48300 $\pm$ 1425 $\mu\text{m}^2$ |
| 50mgF/L | 43700 $\pm$ 4278 $\mu\text{m}^2$ | 22341 $\pm$ 4924 $\mu\text{m}^2$ | 41166 $\pm$ 3659 $\mu\text{m}^2$ |

  

| SUBMANDIBULAR |                                  |                                  |                                  |
|---------------|----------------------------------|----------------------------------|----------------------------------|
|               | Parenchyma area                  | Stromal area                     | Total acinar area                |
| Control       | 46286 $\pm$ 6342 $\mu\text{m}^2$ | 11910 $\pm$ 1782 $\mu\text{m}^2$ | 40680 $\pm$ 5803 $\mu\text{m}^2$ |
| 10mgF/L       | 57736 $\pm$ 4176 $\mu\text{m}^2$ | 14588 $\pm$ 4176 $\mu\text{m}^2$ | 48228 $\pm$ 4178 $\mu\text{m}^2$ |
| 50mgF/L       | 57342 $\pm$ 1427 $\mu\text{m}^2$ | 9940 $\pm$ 1588 $\mu\text{m}^2$  | 49766 $\pm$ 1676 $\mu\text{m}^2$ |

  

| SUBLINGUAL |                                  |                                  |                                  |
|------------|----------------------------------|----------------------------------|----------------------------------|
|            | Parenchyma area                  | Stromal area                     | Total acinar area                |
| Control    | 47535 $\pm$ 2210 $\mu\text{m}^2$ | 17348 $\pm$ 1488 $\mu\text{m}^2$ | 46868 $\pm$ 2256 $\mu\text{m}^2$ |
| 10mgF/L    | 49336 $\pm$ 4177 $\mu\text{m}^2$ | 18362 $\pm$ 3805 $\mu\text{m}^2$ | 46191 $\pm$ 5074 $\mu\text{m}^2$ |
| 50mgF/L    | 40123 $\pm$ 1436 $\mu\text{m}^2$ | 27201 $\pm$ 1436 $\mu\text{m}^2$ | 38952 $\pm$ 1461 $\mu\text{m}^2$ |

**Supplementary Table S2:** Nonparametric results of the analysis of the immunostained area fraction of the smooth muscle actin filaments of the myoepithelial cells of the salivary glands of mice exposed to 10mgF/L and 50mgF/L for 60 days. Results are expressed as median and interquartile deviation.

|         | Area Fraction |                     |               |                     |            |                     |
|---------|---------------|---------------------|---------------|---------------------|------------|---------------------|
|         | Parotid       |                     | Submandibular |                     | Sublingual |                     |
|         | Median        | Interquartile range | Median        | Interquartile range | Median     | Interquartile range |
| Control | 22.04         | 16.67               | 21.34         | 7.65                | 5.047      | 1.887               |
| 10mgF/L | 18.58         | 5.85                | 13.79         | 2.02                | 3.390      | 1.703               |
| 50mgF/L | 24.31         | 10.09               | 20.92         | 10                  | 4.651      | 4.268               |
